# Supplementary material
Source: PubMed Central journal article supplement (PMC10006702)

Heatmap of transcriptome C. elegans embryo and adult form

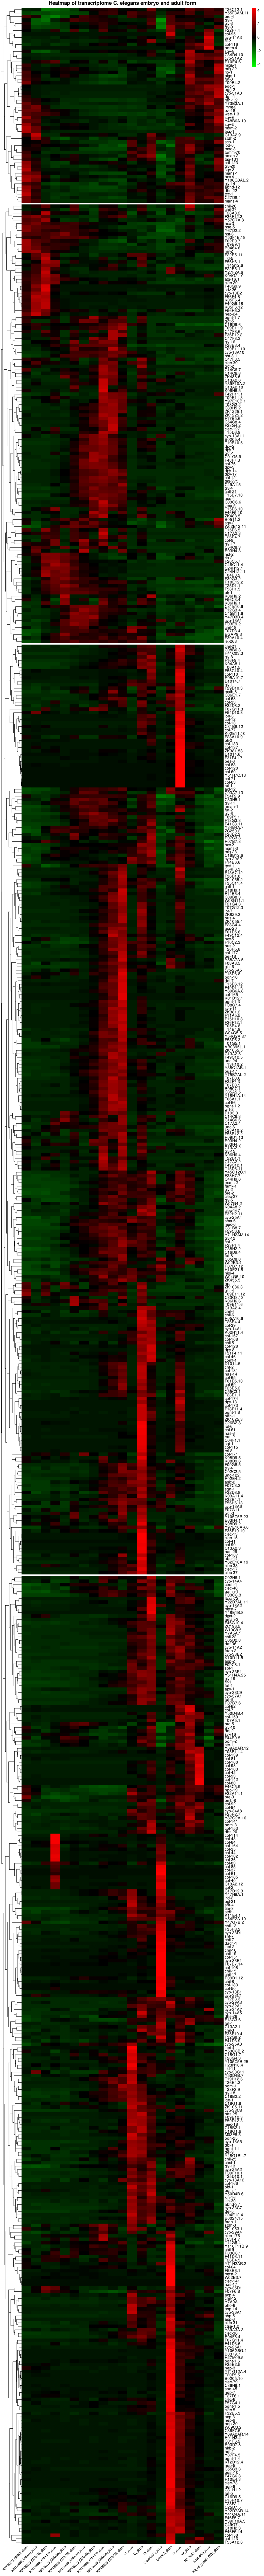

Supplement: mmc2.pdf [file mmc2.pdf]
