# Supplementary material
Source: PubMed Central journal article supplement (PMC10006702)
Supplement: mmc3.pdf [file mmc3.pdf]

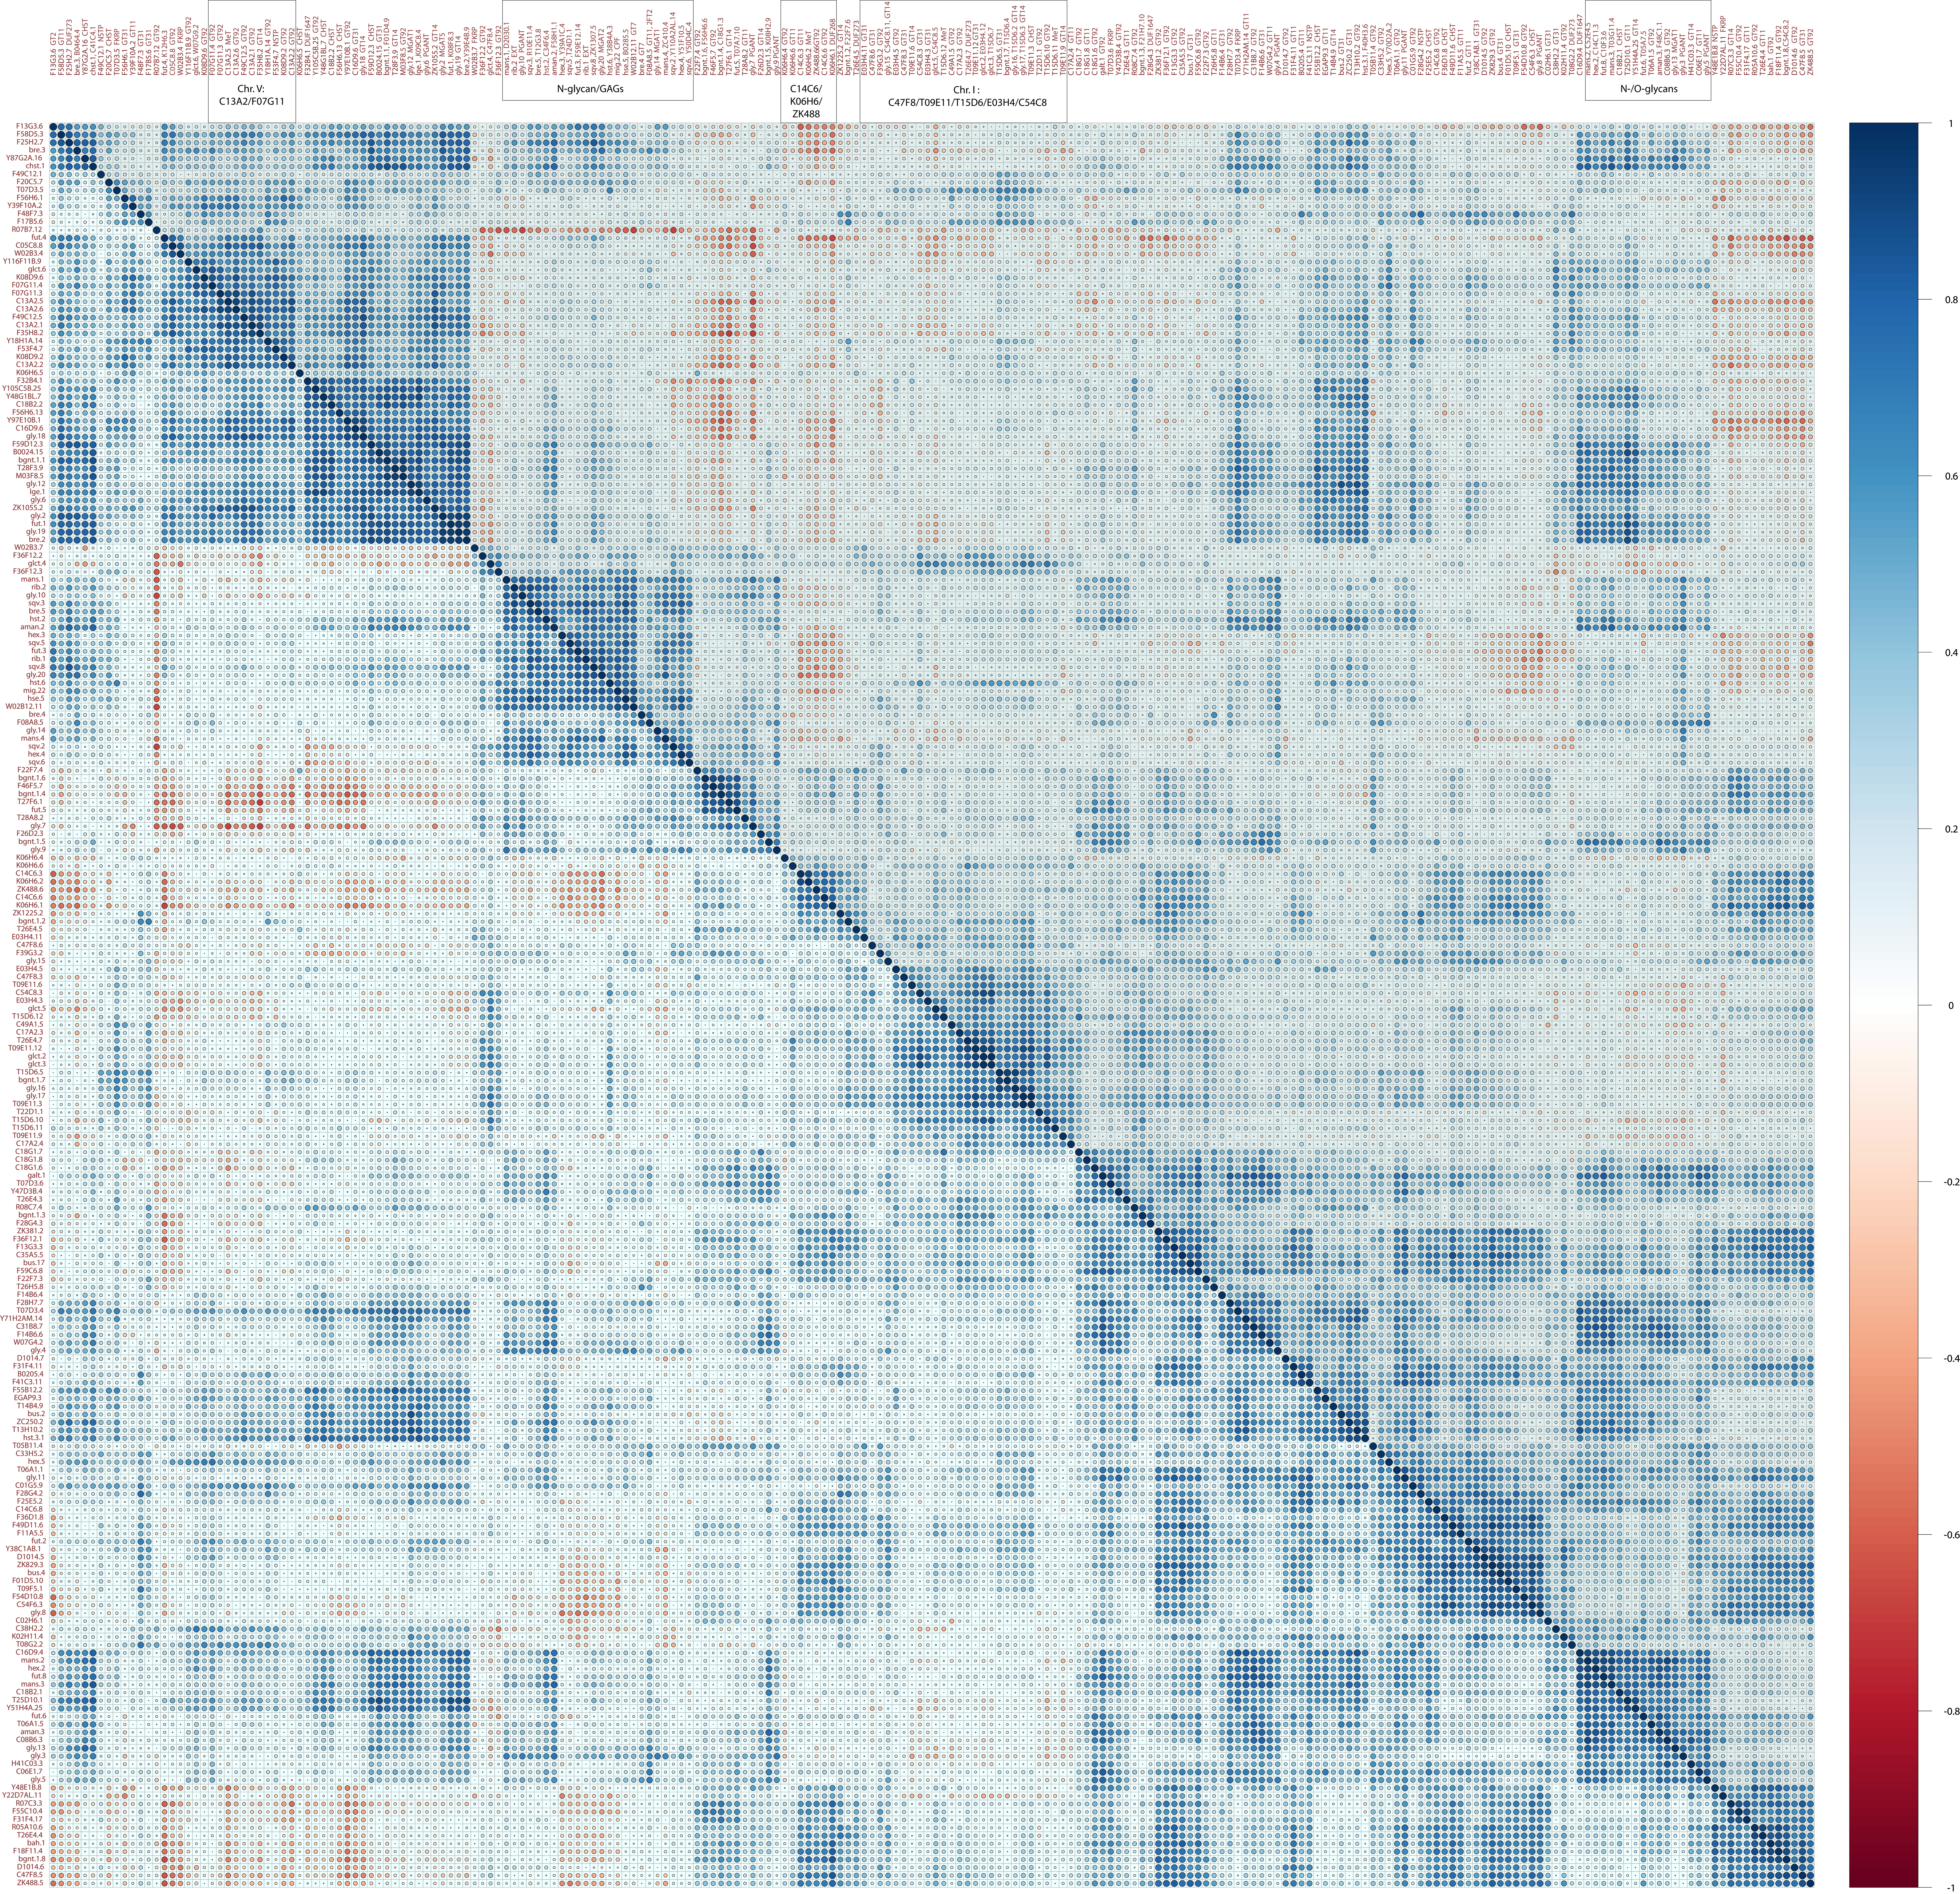

Chr. V:  
C13A22/F07G11

N-glycan/GAGs

C14C6/  
K06H6/  
ZK488

Chr. I:  
C47F8/T09E11/T15D6/E03H4/C54C8

N/O-glycans

1  
0.8  
0.6  
0.4  
0.2  
0  
-0.2  
-0.4  
-0.6  
-0.8
